# Supplementary material for: Unveiling the impurity-modulated photoluminescence from Mn2+-containing metal chalcogenide semiconductors via Fe2+ doping
Source: Royal Society of Chemistry journal article supplement (doi:10.1039/d1tc03944j), 2021-01-01
Supplement: d1tc03944j1.pdf [file d1tc03944j1.pdf]

*Electronic Supplementary Information (ESI) for*

**Unveiling the impurity-modulated photoluminescence from Mn<sup>2+</sup>-  
containing metal chalcogenide semiconductor via Fe<sup>2+</sup> doping**

Zhiqiang Wang,<sup>a</sup> Yong Liu,<sup>a</sup> Jiaxu Zhang,<sup>a</sup> Xiang Wang,<sup>a</sup> Zhou Wu,<sup>a</sup> Jin Wu,<sup>a</sup> Ning Chen,<sup>a</sup> Dong-sheng Li,<sup>c</sup>  
and Tao Wu<sup>\*b</sup>

<sup>a</sup> College of Chemistry, Chemical Engineering and Materials Science, Soochow University, Jiangsu 215123, China.

<sup>b</sup> College of Chemistry and Materials Science, Guangdong Provincial Key Laboratory of Functional Supramolecular Coordination Materials and Applications, Jinan University, Guangzhou 510632, China.

<sup>c</sup> College of Materials and Chemical Engineering, Hubei Provincial Collaborative Innovation Centre for New Energy Microgrid, Key Laboratory of Inorganic Nonmetallic Crystalline and Energy Conversion Materials, China Three Gorges University, Yichang 443002, China.

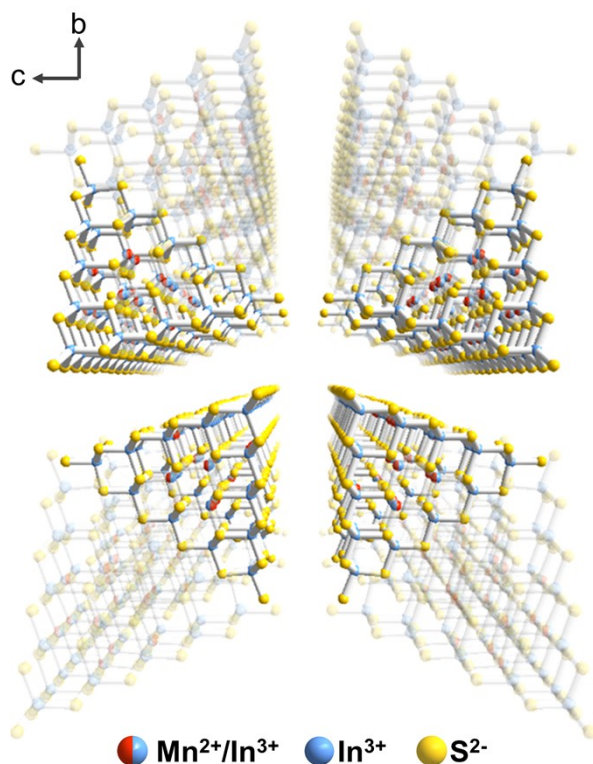

**Figure S1.** Assembly of T5-MnInS cluster-based one-dimensional metal chalcogenides. Note: Positively-charged protonated organic amines around each cluster are omitted for clarity.

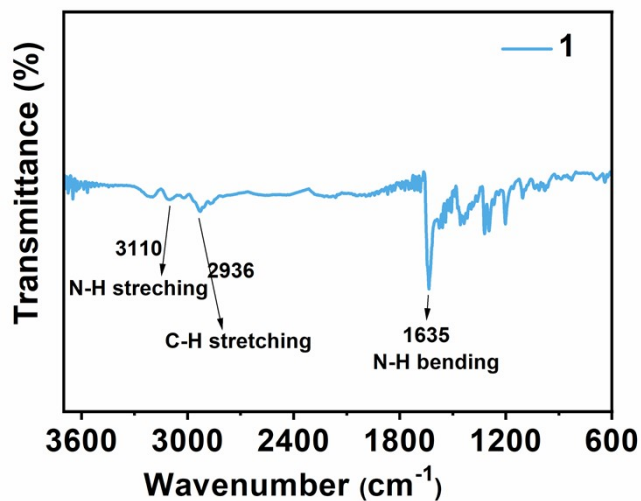

**Figure S2.** FTIR spectrum of **1**. Stretching and bending modes of N-H as well as stretching mode of C-H are displayed, indicating the existence of organic amines in **1**.

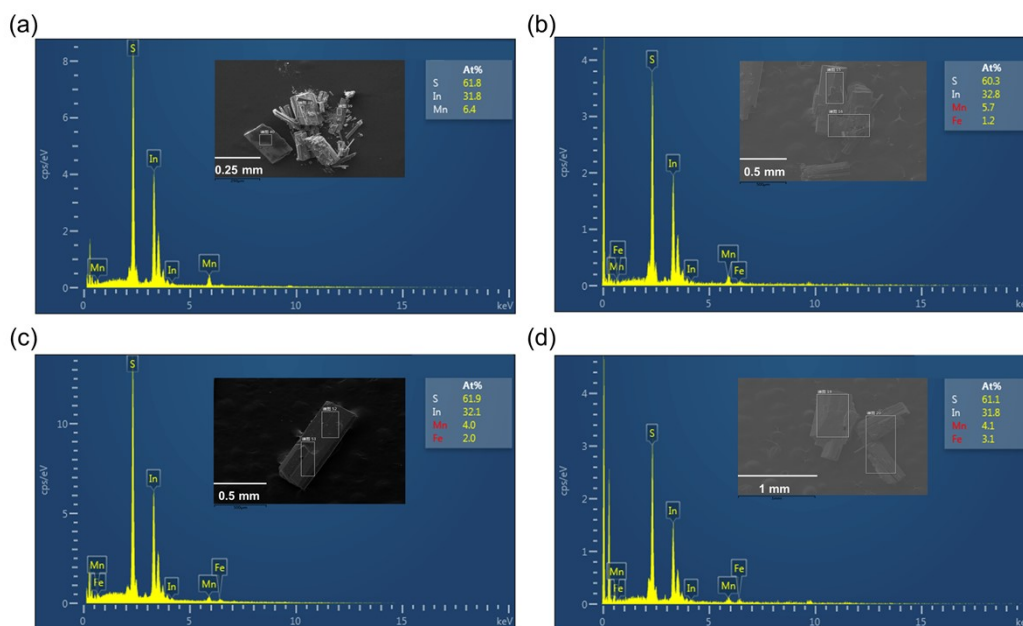

**Figure S3.** Energy dispersive spectroscopy (EDS) of (a) **1**, (b) **1-A**, (c) **1-B**, and (d) **1-C**. The inserts are SEM images of corresponding as-synthesized microcrystal samples. For **1**, the atom ratio of In : Mn is near 5 : 1, being in accordance with the SCXRD results. The actual corresponding ratios of Fe : Mn atom number are 1.2 : 5.7, 2.0 : 4.0 and 3.1 : 4.1 for **1-A**, **1-B**, and **1-C**, respectively, which suggest the doping level of averagely 1, 2 and 3 Fe<sup>2+</sup> ions per T5 cluster, respectively. Thus, the chemical formulas of Fe<sup>2+</sup>-doped samples mentioned above can be estimated to be [Fe<sub>1.04</sub>Mn<sub>4.96</sub>In<sub>28</sub>S<sub>55</sub>] $\cdot$ 6.6(H<sup>+</sup>-DBU) $\cdot$ 3.7(2H<sup>+</sup>-TMEDA), [Fe<sub>2</sub>Mn<sub>4</sub>In<sub>28</sub>S<sub>55</sub>] $\cdot$ 6.6(H<sup>+</sup>-DBU) $\cdot$ 3.7(2H<sup>+</sup>-TMEDA) and [Fe<sub>2.6</sub>Mn<sub>3.4</sub>In<sub>28</sub>S<sub>55</sub>] $\cdot$ 6.6(H<sup>+</sup>-DBU) $\cdot$ 3.7(2H<sup>+</sup>-TMEDA), respectively.

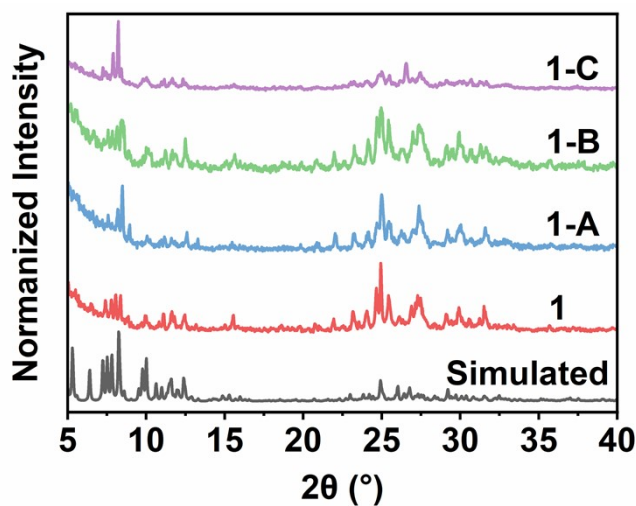

**Figure S4.** Powder XRD patterns of **1** and Fe<sup>2+</sup>-doped samples (**1-A**, **1-B**, and **1-C**) as well as the simulated PXRD patterns.

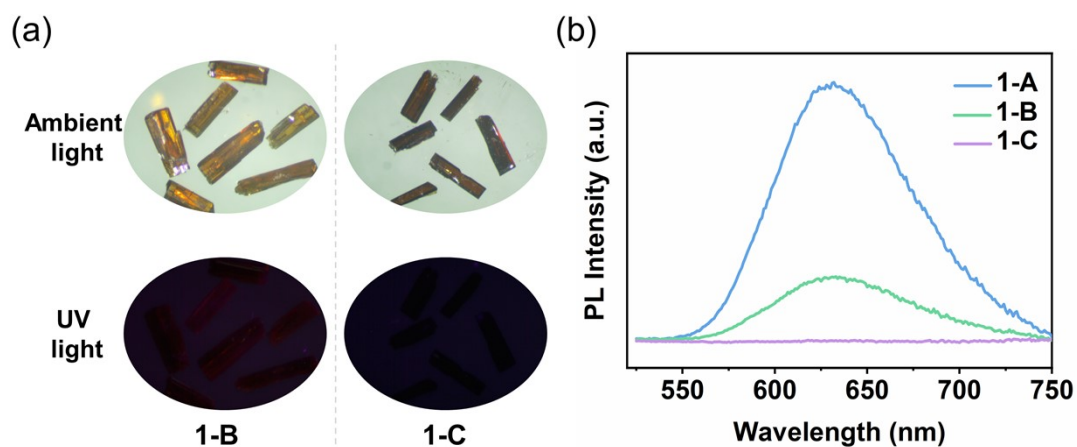

**Figure S5.** (a) Optical photographs of **1-B** and **1-C** under either ambient light or 365 nm excitation. As is from our naked eyes, single crystals of **1-B** show very weak red PL emission, while **1-C** shows no emission. (b) The steady-state PL spectra of **1-A**, **1-B**, and **1-C**.

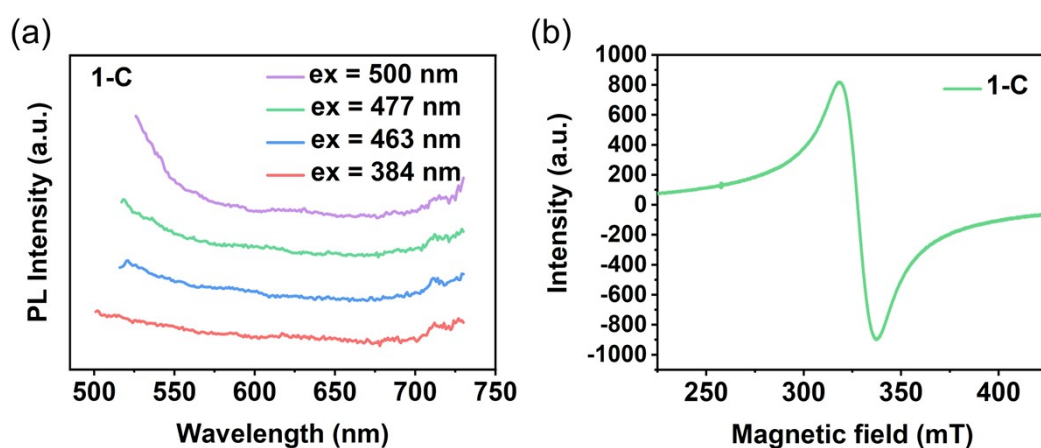

**Figure S6.** (a) Room-temperature steady-state PL spectra of **1-C** under varied excitation wavelength. (b) Electron paramagnetic resonance spectrum (EPR) of **1-C**. The broad signal is an indication of Mn $\cdots$ Mn coupling interaction.

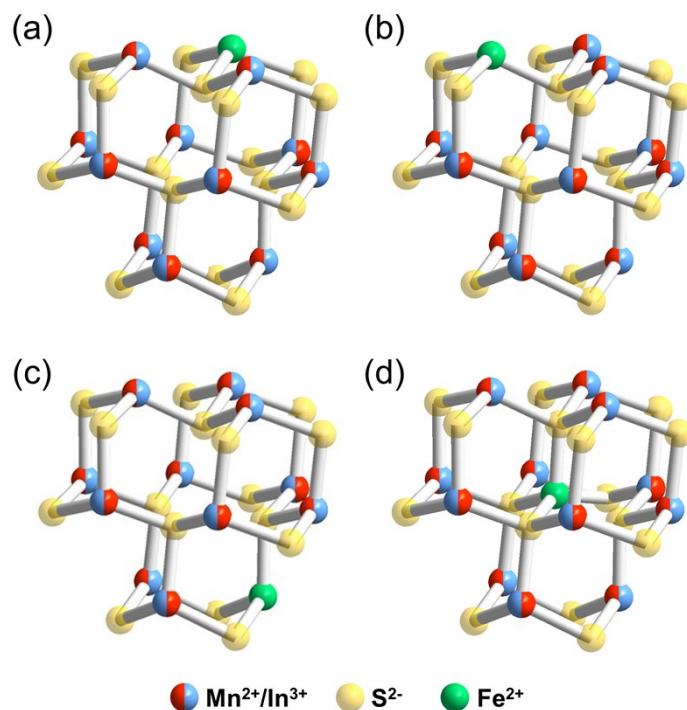

**Figure S7.** Schematic illustration of the core region in  $\text{Fe}^{2+}$ -doped T5-MnInS cluster with one  $\text{Mn}^{2+}$  ion substituted by one  $\text{Fe}^{2+}$  ion. 12  $\text{Mn}^{2+}/\text{In}^{3+}$  mixed sites are homogeneously distributed at four faces of T5 cluster. Hence, Figure (a-c) represent the doping of 1  $\text{Fe}^{2+}$  impurity at one face of T5 cluster, respectively. Figure (d) displays the possible  $\text{Fe}^{2+}$  impurity doping into the void center site due to the slightly smaller radius of  $\text{Fe}^{2+}$  (74 pm) than that of  $\text{Mn}^{2+}$  (80 pm). In a word, **1-A** with averagely one  $\text{Fe}^{2+}$  ion in each T5 cluster ensures the strong  $\text{Mn}\cdots\text{Mn}$  and  $\text{Mn}\cdots\text{Fe}$  coupling interactions.

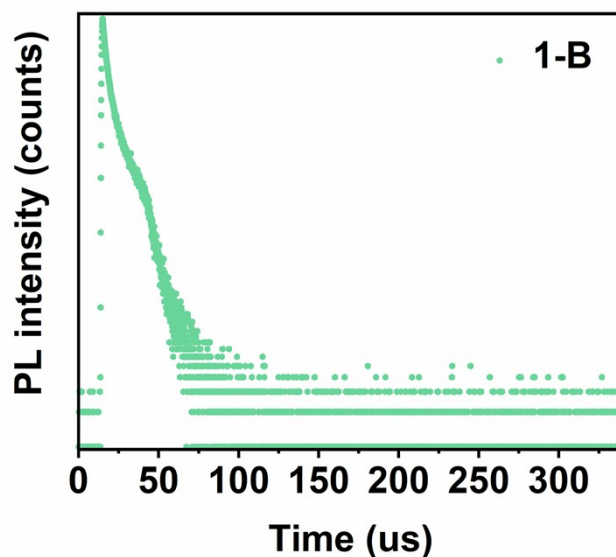

**Figure S8.** PL decay curve of **1-B** (excited at 384 nm and measured at 634 nm).

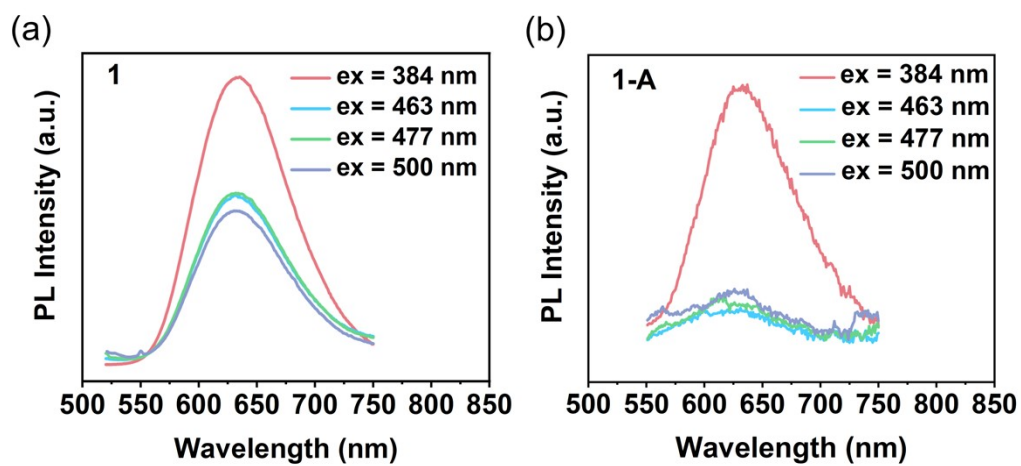

**Figure S9.** PL spectra of **1** and **1-A** at different excitation wavelength.

**Table S1.** Structure refinement parameters on **1**.

| Compound                                                                    | <b>1</b>                                                                                                |
|-----------------------------------------------------------------------------|---------------------------------------------------------------------------------------------------------|
| Empirical formula of framework                                              | In <sub>28</sub> Mn <sub>6</sub> S <sub>55</sub> C <sub>81.6</sub> H <sub>178.8</sub> N <sub>20.6</sub> |
| Formula weight                                                              | 5307.90                                                                                                 |
| CCDC number                                                                 | 2012861                                                                                                 |
| Crystal system                                                              | orthorhombic                                                                                            |
| Space group                                                                 | <i>Cmcm</i>                                                                                             |
| Z                                                                           | 8                                                                                                       |
| <i>a</i> (Å)                                                                | 19.508(10)                                                                                              |
| <i>b</i> (Å)                                                                | 46.77(2)                                                                                                |
| <i>c</i> (Å)                                                                | 42.60(3)                                                                                                |
| $\alpha$ (deg.)                                                             | 90                                                                                                      |
| $\beta$ (deg.)                                                              | 90                                                                                                      |
| $\gamma$ (deg.)                                                             | 90                                                                                                      |
| <i>V</i> (Å <sup>3</sup> )                                                  | 38870(40)                                                                                               |
| GOF on <i>F</i> <sup>2</sup>                                                | 1.067                                                                                                   |
| <i>R</i> <sub>1</sub> , <i>wR</i> <sub>2</sub> ( <i>I</i> > 2σ( <i>I</i> )) | 0.0632, 0.1897                                                                                          |
| <i>R</i> <sub>1</sub> , <i>wR</i> <sub>2</sub> (all data)                   | 0.0794, 0.2153                                                                                          |

**Table S2.** Fitting details of PL decays of **1**, **1-A**, and **1-B** (excited at 384 nm and measured at 634 nm).

|              | <b>1</b>         | <b>1-A</b>        | <b>1-B</b>      |
|--------------|------------------|-------------------|-----------------|
| $\tau_1$     | 29.35 us / 76.8% | 14.41 us / 82.30% | 10 us / 71.24%  |
| $\tau_2$     | 90.35 us / 23.2% | 3.24 us / 17.7%   | 1.8 us / 28.76% |
| $\tau_{ave}$ | 43.5 us          | 12.4 us           | 7.65 us         |

**Table S3.** The fitting details of Mn<sup>2+</sup>-related PL decay curves of **1** detected at 634 nm under varied excitation wavelength.

|             | <b>Ex = 384 nm</b> | <b>Ex = 463 nm</b> | <b>Ex = 477 nm</b> | <b>Ex = 500 nm</b> |
|-------------|--------------------|--------------------|--------------------|--------------------|
| $\tau_1$    | 29.35 us / 76.8%   | 26.7 us / 78.92%   | 26.4 us / 77.09%   | 28.27 us / 81.22%  |
| $\tau_2$    | 90.35 us / 23.2%   | 74.86 us / 21.08%  | 69.68 us / 22.91%  | 75.63 us / 18.78%  |
| $\tau_{av}$ | 43.5 us            | 36.85 us           | 36.32 us           | 37.16 us           |
| e           |                    |                    |                    |                    |

**Table S4.** The fitting details of Mn<sup>2+</sup>-related PL decay curves of **1-A** detected at 634 nm under varied excitation wavelength.

|             | <b>Ex = 384 nm</b> | <b>Ex = 463 nm</b> | <b>Ex = 477 nm</b> | <b>Ex = 500 nm</b> |
|-------------|--------------------|--------------------|--------------------|--------------------|
| $\tau_1$    | 14.41 us / 82.30%  | 12.82 us / 79.13%  | 12.83 us / 79.26%  | 12.68 us / 82.93%  |
| $\tau_2$    | 3.24 us / 17.70%   | 1.77 us / 20.87%   | 1.88 us / 20.74%   | 1.84 us / 17.07%   |
| $\tau_{av}$ | 12.4 us            | 10.5 us            | 10.56 us           | 10.8 us            |

---

e

---
